# Supplementary material for: Cultivation and Complete Genome Sequencing of Gloeobacter kilaueensis sp. nov., from a Lava Cave in Kīlauea Caldera, Hawai'i
Source: PLoS One. 2013 Oct 23;8(10):e76376. doi: 10.1371/journal.pone.0076376 (PMC3806779; doi:10.1371/journal.pone.0076376)
Supplement: Table S1 — Genes in the five ‘suspicious’ regions identified in the JS1T genome. See text for further details. (XLSX) [file pone.0076376.s007.xlsx]

## Sheet: Sheet1
Region	Genes	Product	Top BLAST hit class
415517-431636	GKIL_0383	hypothetical protein	Chroococcales
415517-431636	GKIL_0384	RecA-family ATPase	Clostridia
415517-431636	GKIL_0385	hypothetical protein	no BLAST hit
415517-431636	GKIL_0386	hypothetical protein	no BLAST hit
415517-431636	GKIL_0387	hypothetical protein	no BLAST hit
415517-431636	GKIL_0388	hypothetical protein	no BLAST hit
415517-431636	GKIL_0389	hypothetical protein	no BLAST hit
415517-431636	GKIL_0390	phage terminase large subunit	Caudovirales
415517-431636	GKIL_0391	phage tail tape measure protein, TP901 family	Negativicutes
415517-431636	GKIL_0392	hypothetical protein	no BLAST hit
415517-431636	GKIL_0393	hypothetical protein	no BLAST hit
415517-431636	GKIL_0394	hypothetical protein	Gloeobacteria
415517-431636	GKIL_0395	transcriptional regulator	Chroococcales
415517-431636	GKIL_0396	swim zinc finger domain protein	Halobacteria
415517-431636	GKIL_0397	hypothetical protein	no BLAST hit
415517-431636	GKIL_0398	hypothetical protein	no BLAST hit
415517-431636	GKIL_0399	hypothetical protein	no BLAST hit
415517-431636	GKIL_0400	hypothetical protein	no BLAST hit
415517-431636	GKIL_0401	hypothetical protein	no BLAST hit
903207-946727	GKIL_0863	phage integrase family protein	Oscillatoriales
903207-946727	GKIL_0864	hypothetical protein	no BLAST hit
903207-946727	GKIL_0865	hypothetical protein	no BLAST hit
903207-946727	GKIL_0866	hypothetical protein	Chroococcales
903207-946727	GKIL_0867	hypothetical protein	no BLAST hit
903207-946727	GKIL_0868	hypothetical protein	Deltaproteobacteria
903207-946727	GKIL_0869	hypothetical protein	no BLAST hit
903207-946727	GKIL_0870	pentapeptide repeat-containing protein	Caudovirales
903207-946727	GKIL_0871	hypothetical protein	no BLAST hit
903207-946727	GKIL_0872	hypothetical protein	Chroococcales
903207-946727	GKIL_0873	hypothetical protein	Negativicutes
903207-946727	GKIL_0874	hypothetical protein	no BLAST hit
903207-946727	GKIL_0875	hypothetical protein	no BLAST hit
903207-946727	GKIL_0876	hypothetical protein	no BLAST hit
903207-946727	GKIL_0877	hypothetical protein	no BLAST hit
903207-946727	GKIL_0878	hypothetical protein	no BLAST hit
903207-946727	GKIL_0879	hypothetical protein	no BLAST hit
903207-946727	GKIL_0880	DNA-cytosine methyltransferase	unclassified phages
903207-946727	GKIL_0881	D12 class N6 adenine-specific DNA methyltransferase	Bacillales
903207-946727	GKIL_0882	hypothetical protein	no BLAST hit
903207-946727	GKIL_0883	hypothetical protein	Chroococcales
903207-946727	GKIL_0884	hypothetical protein	Alphaproteobacteria
903207-946727	GKIL_0885	hypothetical protein	Betaproteobacteria
903207-946727	GKIL_0886	hypothetical protein	no BLAST hit
903207-946727	GKIL_0887	hypothetical protein	no BLAST hit
903207-946727	GKIL_0888	hypothetical protein	no BLAST hit
903207-946727	GKIL_0889	hypothetical protein	Bacillales
903207-946727	GKIL_0890	phage terminase GpA	Alphaproteobacteria
903207-946727	GKIL_0891	hypothetical protein	Caudovirales
903207-946727	GKIL_0892	phage portal protein, lambda family	Caudovirales
903207-946727	GKIL_0893	conserved hypothetical protein	Betaproteobacteria
903207-946727	GKIL_0894	hypothetical protein	no BLAST hit
903207-946727	GKIL_0895	hypothetical protein	no BLAST hit
903207-946727	GKIL_0896	hypothetical protein	no BLAST hit
903207-946727	GKIL_0897	hypothetical protein	no BLAST hit
903207-946727	GKIL_0898	hypothetical protein	no BLAST hit
903207-946727	GKIL_0899	poly(3-hydroxybutyrate) depolymerase	Gloeobacteria
903207-946727	GKIL_0900	hypothetical protein	no BLAST hit
903207-946727	GKIL_0901	hypothetical protein	Betaproteobacteria
903207-946727	GKIL_0902	hypothetical protein	no BLAST hit
903207-946727	GKIL_0903	hypothetical protein	no BLAST hit
903207-946727	GKIL_0904	hypothetical protein	no BLAST hit
903207-946727	GKIL_0905	hypothetical protein	Gloeobacteria
903207-946727	GKIL_0906	hypothetical protein	no BLAST hit
903207-946727	GKIL_0907	hypothetical protein	no BLAST hit
903207-946727	GKIL_0908	Mu-like prophage protein	Gammaproteobacteria
903207-946727	GKIL_0909	conserved hypothetical protein	Alphaproteobacteria
903207-946727	GKIL_0910	conserved hypothetical protein	Alphaproteobacteria
903207-946727	GKIL_0911	cell wall-associated hydrolases (invasion-associated proteins)	Betaproteobacteria
903207-946727	GKIL_0912	hypothetical protein	Alphaproteobacteria
903207-946727	GKIL_0913	hypothetical protein	Alphaproteobacteria
903207-946727	GKIL_0914	hypothetical protein	no BLAST hit
903207-946727	GKIL_0915	hypothetical protein	no BLAST hit
903207-946727	GKIL_0916	multi-sensor signal transduction histidine kinase	Actinobacteridae
903207-946727	GKIL_0917	conserved hypothetical protein	Alphaproteobacteria
903207-946727	GKIL_0918	hypothetical protein	no BLAST hit
903207-946727	GKIL_0919	hypothetical protein	no BLAST hit
903207-946727	GKIL_0920	XRE family transcriptional regulator	Chroococcales
903207-946727	GKIL_0921	hypothetical protein	no BLAST hit
903207-946727	GKIL_0922	conserved hypothetical protein	Bacillales
903207-946727	GKIL_0923	hypothetical protein	no BLAST hit
903207-946727	GKIL_0924	hypothetical protein	Rubrobacteridae
1004060-1015740	GKIL_0974	alcohol dehydrogenase	environmental samples
1004060-1015740	GKIL_0975	2,3-dihydroxybenzoate decarboxylase	Betaproteobacteria
1004060-1015740	GKIL_0976	conserved hypothetical protein	Gammaproteobacteria
1004060-1015740	GKIL_0977	aldehyde dehydrogenase	Gammaproteobacteria
1004060-1015740	GKIL_0978	hypothetical protein	Deinococci
1004060-1015740	GKIL_0979	hypothetical protein	no BLAST hit
1004060-1015740	GKIL_0980	conserved hypothetical protein	Gammaproteobacteria
1004060-1015740	GKIL_0981	hypothetical protein	no BLAST hit
1004060-1015740	GKIL_0982	LysR family transcriptional regulator	Alphaproteobacteria
1004060-1015740	GKIL_0983	TetR family transcriptional regulator	Alphaproteobacteria
1004060-1015740	GKIL_0984	aldo/keto reductase	Alphaproteobacteria
1004060-1015740	GKIL_0985	D,D-heptose 1,7-bisphosphate phosphatase	Gammaproteobacteria
1732580-1828970	GKIL_1689	hypothetical protein	Verrucomicrobiae
1732580-1828970	GKIL_1690	transposase	Oscillatoriales
1732580-1828970	GKIL_1691	hypothetical protein	Verrucomicrobiae
1732580-1828970	GKIL_1692	hypothetical protein	Verrucomicrobiae
1732580-1828970	GKIL_1693	type IV secretory pathway, VirD4 components	Alphaproteobacteria
1732580-1828970	GKIL_1694	hypothetical protein	no BLAST hit
1732580-1828970	GKIL_1695	hypothetical protein	no BLAST hit
1732580-1828970	GKIL_1696	permease	Chloroflexales
1732580-1828970	GKIL_1697	conserved hypothetical protein	Streptophyta
1732580-1828970	GKIL_1698	MerR family transcriptional regulator	Betaproteobacteria
1732580-1828970	GKIL_1699	hypothetical protein	no BLAST hit
1732580-1828970	GKIL_1700	hypothetical protein	Betaproteobacteria
1732580-1828970	GKIL_1701	CaCA family Na(+)/Ca(+) antiporter	Stigonematales
1732580-1828970	GKIL_1702	hypothetical protein	no BLAST hit
1732580-1828970	GKIL_1703	hypothetical protein	no BLAST hit
1732580-1828970	GKIL_1704	hypothetical protein	no BLAST hit
1732580-1828970	GKIL_1705	ATP-dependent metalloprotease FtsH	Dikarya
1732580-1828970	GKIL_1706	hypothetical protein	Betaproteobacteria
1732580-1828970	GKIL_1707	conserved hypothetical protein	Chroococcales
1732580-1828970	GKIL_1708	recombination and DNA strand exchange inhibitor protein	Spirochaetales
1732580-1828970	GKIL_1709	hypothetical protein	no BLAST hit
1732580-1828970	GKIL_1710	hypothetical protein	no BLAST hit
1732580-1828970	GKIL_1711	small-conductance mechanosensitive channel	Hexamitidae
1732580-1828970	GKIL_1712	conserved hypothetical protein	no BLAST hit
1732580-1828970	GKIL_1713	hypothetical protein	no BLAST hit
1732580-1828970	GKIL_1714	hypothetical protein	no BLAST hit
1732580-1828970	GKIL_1715	pullulanase, type I	Alphaproteobacteria
1732580-1828970	GKIL_1716	hypothetical protein	no BLAST hit
1732580-1828970	GKIL_1717	transposase	Chroococcales
1732580-1828970	GKIL_1718	signal peptidase I	Negativicutes
1732580-1828970	GKIL_1719	conserved hypothetical protein	Gloeobacteria
1732580-1828970	GKIL_1720	hypothetical protein	no BLAST hit
1732580-1828970	GKIL_1721	plasmid segregation protein ParM	Nostocales
1732580-1828970	GKIL_1722	hypothetical protein	no BLAST hit
1732580-1828970	GKIL_1723	hypothetical protein	Deltaproteobacteria
1732580-1828970	GKIL_1724	hypothetical protein	Deltaproteobacteria
1732580-1828970	GKIL_1725	hypothetical protein	Deltaproteobacteria
1732580-1828970	GKIL_1726	prolipoprotein diacylglyceryl transferase	Chroococcales
1732580-1828970	GKIL_1727	DNA-directed RNA polymerase subunit beta	Chroococcales
1732580-1828970	GKIL_1728	endonuclease/exonuclease/phosphatase	Gloeobacteria
1732580-1828970	GKIL_1729	hypothetical protein	no BLAST hit
1732580-1828970	GKIL_1730	hypothetical protein	no BLAST hit
1732580-1828970	GKIL_1731	hypothetical protein	no BLAST hit
1732580-1828970	GKIL_1732	hypothetical protein	no BLAST hit
1732580-1828970	GKIL_1733	hypothetical protein	no BLAST hit
1732580-1828970	GKIL_1734	hypothetical protein	Chroococcales
1732580-1828970	GKIL_1735	Ycf35	Nostocales
1732580-1828970	GKIL_1736	conserved hypothetical protein	Clostridia
1732580-1828970	GKIL_1737	ATP-dependent metalloprotease	Chroococcales
1732580-1828970	GKIL_1738	hypothetical protein	Gloeobacteria
1732580-1828970	GKIL_1739	pentapeptide repeat-containing protein	Chroococcales
1732580-1828970	GKIL_1740	hypothetical protein	no BLAST hit
1732580-1828970	GKIL_1741	hypothetical protein	no BLAST hit
1732580-1828970	GKIL_1742	DNA polymerase III subunit beta	Gloeobacteria
1732580-1828970	GKIL_1743	ribonuclease E	Oscillatoriales
1732580-1828970	GKIL_1744	hypothetical protein	Oscillatoriales
1732580-1828970	GKIL_1745	conserved hypothetical protein	Nostocales
1732580-1828970	GKIL_1746	hypothetical protein	Oscillatoriales
1732580-1828970	GKIL_1747	hypothetical protein	Chroococcales
1732580-1828970	GKIL_1748	hypothetical protein	Chroococcales
1732580-1828970	GKIL_1749	hypothetical protein	Nostocales
1732580-1828970	GKIL_1750	thiamine biosynthesis protein ThiF	Oscillatoriales
1732580-1828970	GKIL_1751	type I restriction-modification system methyltransferase subunit	Chroococcales
1732580-1828970	GKIL_1752	ATP-dependent DNA helicase Rep	Coriobacteridae
1732580-1828970	GKIL_1753	cob(I)alamin adenosyltransferase	Chroococcales
1732580-1828970	GKIL_1754	DNA primase	Deltaproteobacteria
1732580-1828970	GKIL_1755	hypothetical protein	no BLAST hit
1732580-1828970	GKIL_1756	hypothetical protein	no BLAST hit
1732580-1828970	GKIL_1757	YD repeat-containing protein	Gloeobacteria
1732580-1828970	GKIL_1758	hypothetical protein	no BLAST hit
1732580-1828970	GKIL_1759	hypothetical protein	no BLAST hit
1732580-1828970	GKIL_1760	type IV secretory pathway, VirB4 components	Deltaproteobacteria
1732580-1828970	GKIL_1761	apolipoprotein N-acyltransferase	Clostridia
1732580-1828970	GKIL_1762	conserved hypothetical protein	Chroococcales
1732580-1828970	GKIL_1763	hypothetical protein	Gloeobacteria
1732580-1828970	GKIL_1764	conserved hypothetical protein	Alphaproteobacteria
1732580-1828970	GKIL_1765	transcriptional regulator	Alphaproteobacteria
1732580-1828970	GKIL_1766	protein-S-isoprenylcysteine methyltransferase	Oscillatoriales
1732580-1828970	GKIL_1767	hypothetical protein	no BLAST hit
1732580-1828970	GKIL_1768	conserved hypothetical protein	Chroococcales
1732580-1828970	GKIL_1769	hypothetical protein	no BLAST hit
1732580-1828970	GKIL_1770	hypothetical protein	no BLAST hit
1732580-1828970	GKIL_1771	transposase	Deltaproteobacteria
1732580-1828970	GKIL_1772	transposase IS3/IS911 family protein	Gammaproteobacteria
1732580-1828970	GKIL_1773	hypothetical protein	no BLAST hit
1732580-1828970	GKIL_1774	GCN5-related N-acetyltransferase	Gammaproteobacteria
1732580-1828970	GKIL_1775	conserved hypothetical protein	Alphaproteobacteria
1732580-1828970	GKIL_1776	conserved hypothetical protein	Gloeobacteria
1732580-1828970	GKIL_1777	hypothetical protein	no BLAST hit
1732580-1828970	GKIL_1778	conserved hypothetical protein	Gammaproteobacteria
4262380-4279810	GKIL_4053	conserved hypothetical protein	Oscillatoriales
4262380-4279810	GKIL_4054	conserved hypothetical protein	Oscillatoriales
4262380-4279810	GKIL_4055	conserved hypothetical protein	Oscillatoriales
4262380-4279810	GKIL_4056	hypothetical protein	Oscillatoriales
4262380-4279810	GKIL_4057	conserved hypothetical protein	Oscillatoriales
4262380-4279810	GKIL_4058	hypothetical protein	Oscillatoriales
4262380-4279810	GKIL_4059	CRISPR-associated protein Cas2	Chroococcales
4262380-4279810	GKIL_4060	CRISPR-associated protein Cas1	Chroococcales
4262380-4279810	GKIL_4061	hypothetical protein	Chroococcales
4262380-4279810	GKIL_4062	conserved hypothetical protein	Chroococcales
4262380-4279810	GKIL_4063	plasmid stabilization system protein	Gloeobacteria
4262380-4279810	GKIL_4064	conserved hypothetical protein	Oscillatoriales
4262380-4279810	GKIL_4065	HNH endonuclease	Chroococcales
