# Supplementary material for: Cultivation and Complete Genome Sequencing of Gloeobacter kilaueensis sp. nov., from a Lava Cave in Kīlauea Caldera, Hawai'i
Source: PLoS One. 2013 Oct 23;8(10):e76376. doi: 10.1371/journal.pone.0076376 (PMC3806779; doi:10.1371/journal.pone.0076376)
Supplement: Table S2 — CRISPR repeats in the JS1T genome, and the number of spacers in each. (XLSX) [file pone.0076376.s008.xlsx]

## Sheet: Sheet1
Region	Direct Repeat	Number of spacers
2066878-2070197	ATCGAAACGACCACCATCCCTGCAAAGGGATTGAAAC	45
2486198-2486962	GTTTCCGTCCCCTCGCGGGGATTAGGTCCACTCGAAC	9
2600618-2602373	GCGATTCAATCAGTGACTCCTTTCGGAGTTGAGCAC	24
4271404-4272947	GTTTCCAATCTAATCGTCCGCTGAGGGACGTCGAAC	19
4273038-4274931	GTTTCCAATCTAATCGTCCGCTGAGGGACGTCGAAC	22
